# Supplementary material
Source: PubMed Central journal article supplement (PMC2781385)

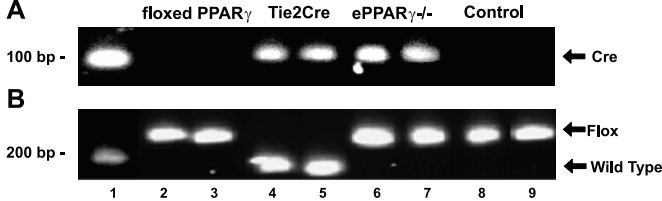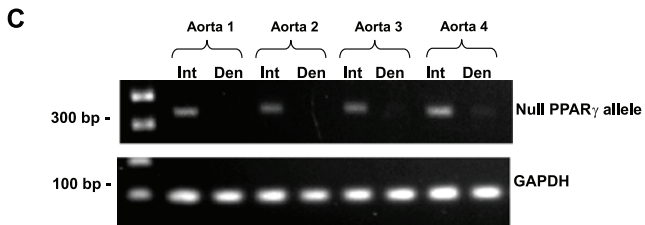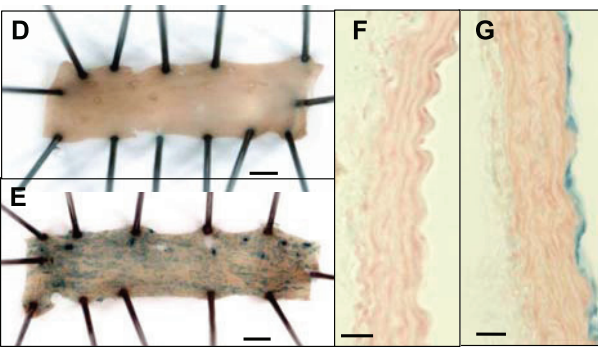

Supplement: 00148.2009v2_1.pdf [file 00148.2009v2_1.pdf]
